# Supplementary material for: Diaphanous-related formin mDia2 regulates beta2 integrins to control hematopoietic stem and progenitor cell engraftment
Source: PubMed Central journal article supplement (PMC7311390; doi:10.1038/s41467-020-16911-4), 2020-06-23
Supplement: 41467_2020_16911_MOESM1_ESM.pdf [file 41467_2020_16911_MOESM1_ESM.pdf]

## Supplementary Information

### **Diaphanous-related formin mDia2 regulates beta2 integrins to control hematopoietic stem and progenitor cell engraftment**

Yang Mei<sup>1,2\*</sup>, Xu Han<sup>1,2</sup>, Yijie Liu<sup>1,2</sup>, Jing Yang<sup>1,2</sup>, Ronen Sumagin<sup>1,2</sup>, and Peng Ji<sup>1,2\*</sup>

1. Department of Pathology, Feinberg School of Medicine, Northwestern University, Chicago, IL, 60611 USA

2. The Robert H. Lurie Comprehensive Cancer Center, Northwestern University, Chicago, IL, 60611 USA

\* Correspondence: yang.mei@northwestern.edu or peng-ji@fsm.northwestern.edu

**Key words:** Hematopoietic stem and progenitor cells, engraftment, Diaphanous-related formins, mDia2, trans-endothelial migration, serum response factor, beta2 integrins, CD11b, CD18

# Supplementary Figures

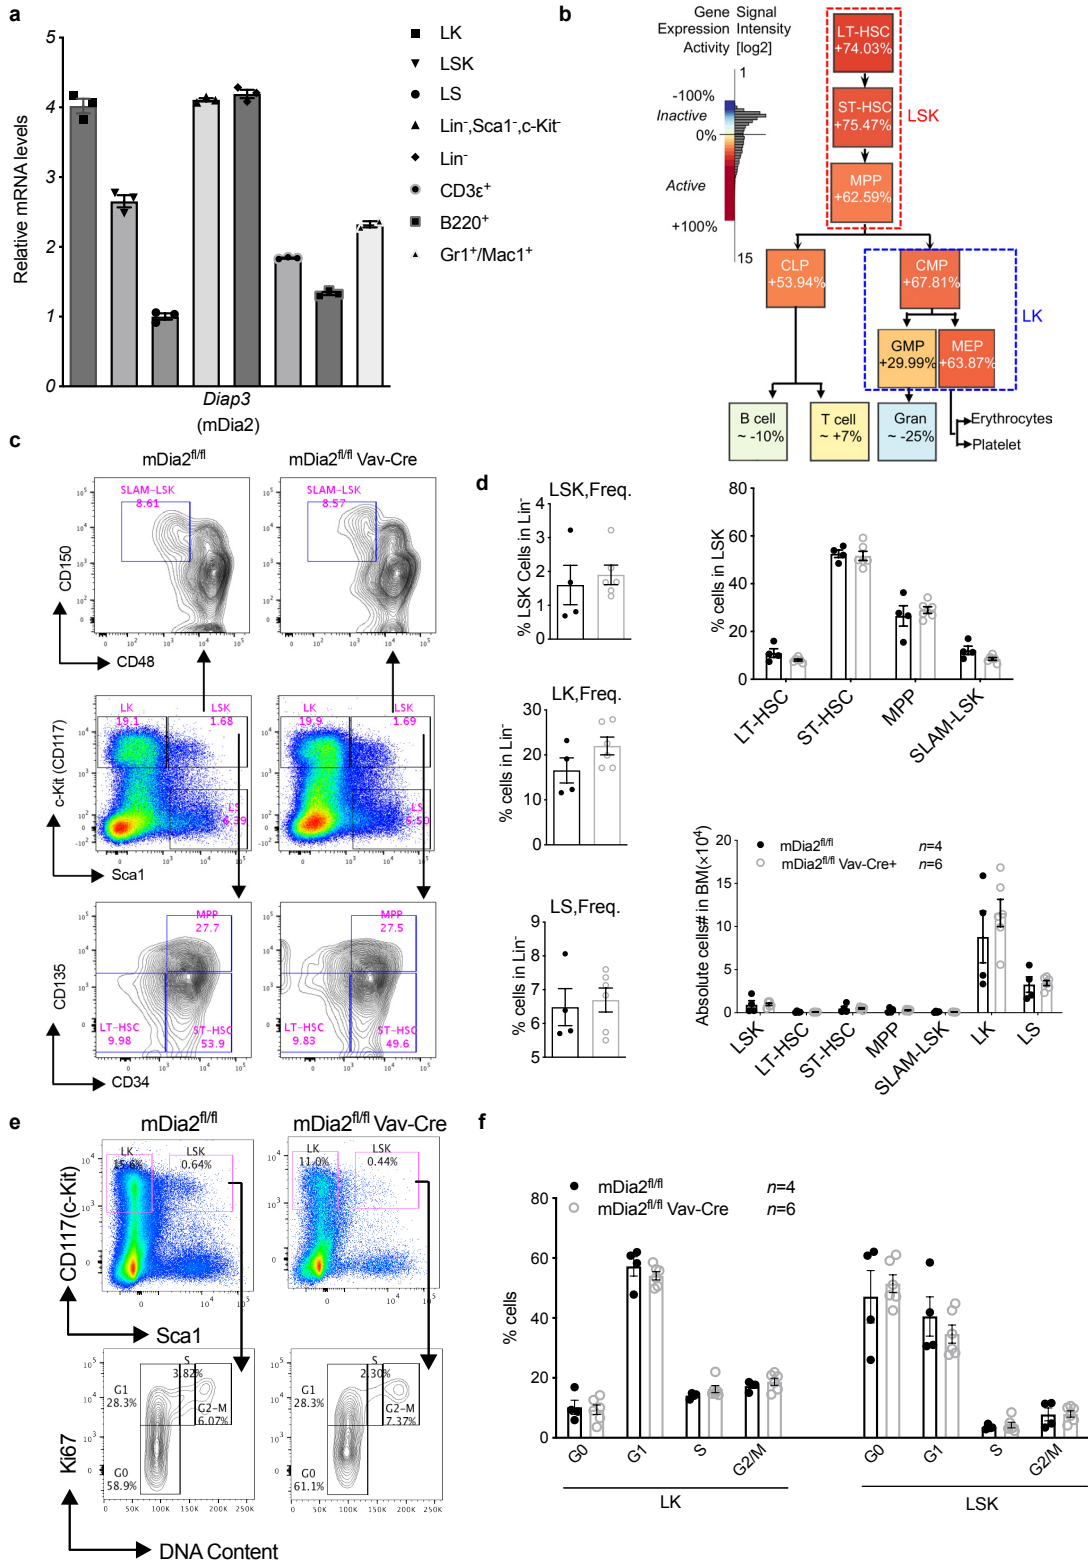

**Supplementary Figure 1. Loss of mDia2 doesn't affect the compositions of HSPCs at steady state** (a) Quantitative real time PCR analyses of the mRNA levels of mouse *Diap3* in the indicated lineages. 18S ribosomal RNA was used as an internal control. The experiment was repeated in triplicate. (b) Highly enriched *Diap3* expression in HSPCs obtained from Gene Expression Commons database <sup>1</sup>. (c) Representative flow cytometry plots for the gating of different HSPC populations in the bone marrow lineage negative cells from mDia2<sup>fl/fl</sup> Vav-Cre and mDia2<sup>fl/fl</sup> control mice at 3-month old. (d) Quantitative analyses of the percentage and absolute cell number of indicated HSPC populations in c. (e) Representative flow cytometry plots of cell cycle profiles of LSK cells from the indicated mice as in c. (f) Quantitative analyses cell cycle profiles of the LK and LSK cells from the bone marrow of indicated mice at 3-month old. *n*=4 mice in mDia2<sup>fl/fl</sup> group, *n*=6 mice in mDia2<sup>fl/fl</sup> Vav-Cre group in d and f. Data is presented as mean ± SEM. \**p* < 0.05, \*\**p* < 0.01, \*\*\**p* < 0.001, \*\*\*\**p*<0.0001. Two-tailed unpaired Student's t test was used to generate the *p* values.

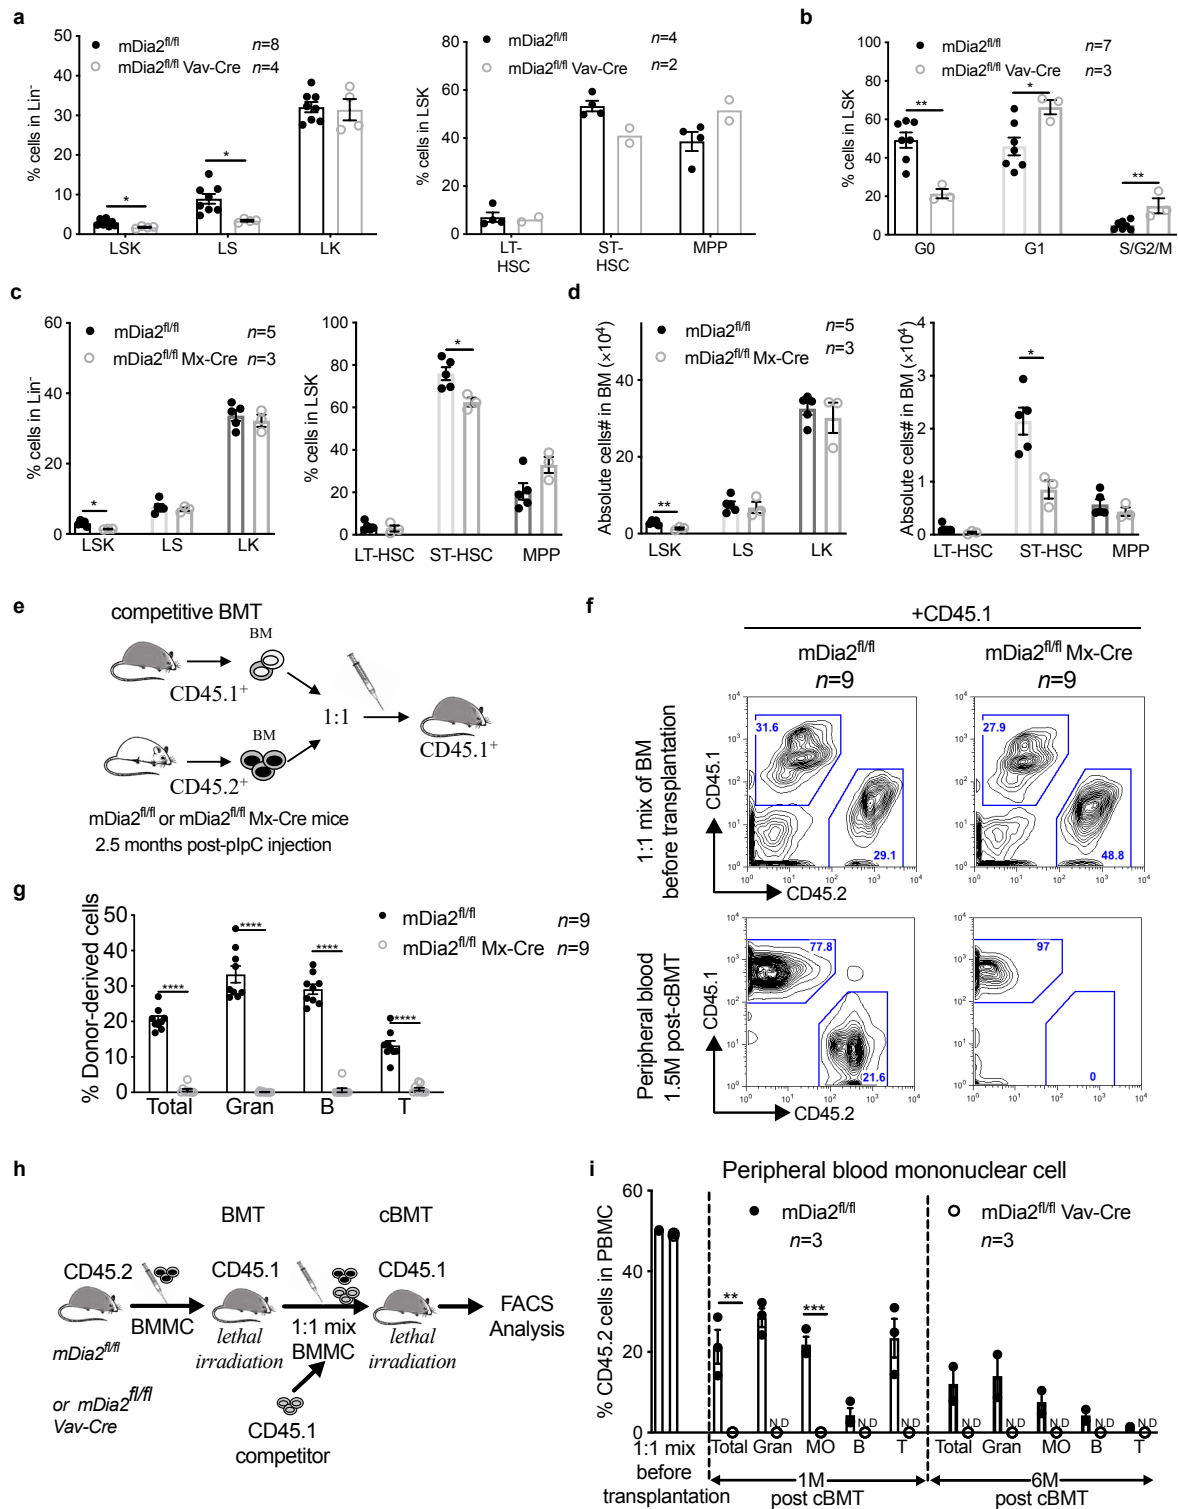

## Supplementary Figure 2. Defects of competitive engraftment ability in mDia2 deficient HSPCs

(a) The percentages of bone marrow HSPCs in wild type recipient mice 10 months after transplantation with  $2 \times 10^6$  control or mDia2<sup>fl/fl</sup>Vav-Cre BMMCs. Left panel,  $n=8$  mice in mDia2<sup>fl/fl</sup> group,  $n=4$  mice in mDia2<sup>fl/fl</sup> Vav-Cre group. Right panel,  $n=4$  mice in mDia2<sup>fl/fl</sup> group,  $n=2$  mice in mDia2<sup>fl/fl</sup> Vav-Cre group. (b) Cell cycle profile of LSK cells from a.  $n=7$  mice in mDia2<sup>fl/fl</sup> group,  $n=3$  mice in mDia2<sup>fl/fl</sup> Vav-Cre group. (c) The percentages of bone marrow HSPCs in wild type recipient mice 10 months after transplantation with  $2 \times 10^6$  control or mDia2<sup>fl/fl</sup>Mx1-Cre BMMCs. (d) The absolute number of the indicated HSPCs in c.  $n=5$  mice in mDia2<sup>fl/fl</sup> group,  $n=3$  mice in mDia2<sup>fl/fl</sup> Vav-Cre group for c and d. (e) Experimental design of competitive bone marrow transplantation with plpC treated mDia2<sup>fl/fl</sup> and mDia2<sup>fl/fl</sup> Mx-Cre mice. (f) Chimerism studies in the peripheral blood 1.5 months after transplantation as in e. (g) Quantitative analyses of the indicated lineages in e.  $n=9$  mice in each group. (h) Experimental design of secondary competitive transplantation using  $2 \times 10^6$  BMMCs from the indicated recipients after primary transplantation with an equal number of wild-type CD45.1 BMMCs. cBMT represents competitive bone marrow transplantation. (i) Peripheral blood chimerism analyses were performed 1 month after competitive transplantation in h.  $n=3$  mice in each group. Error bars represent the SEM of the mean. \* $p < 0.05$ , \*\* $p < 0.01$ , \*\*\* $p < 0.001$ , \*\*\*\* $p < 0.0001$ . Two-tailed unpaired student's t test was used to generate the  $p$  values.

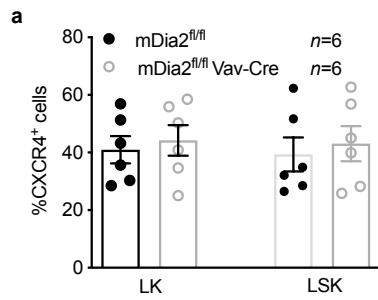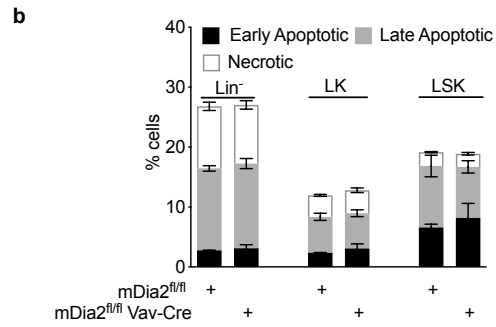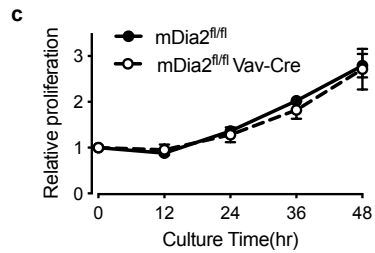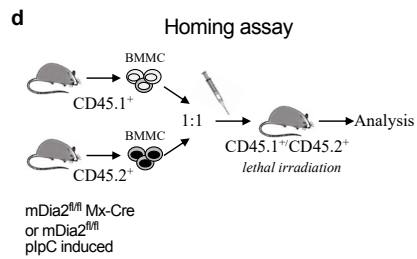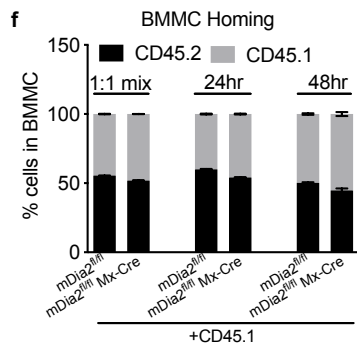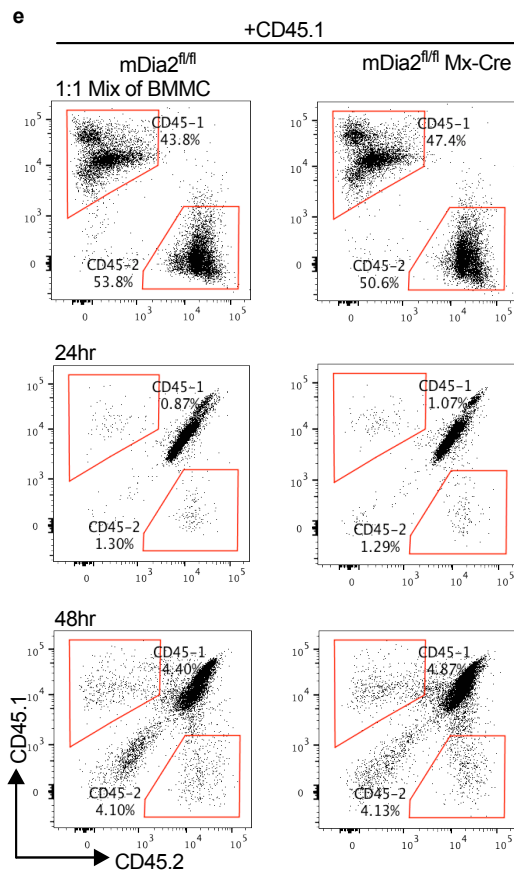

**Supplementary Figure 3. Loss of mDia2 doesn't affect HSPC localization to the BM**

**vasculature** (a) Quantitative analyses of the expression levels of CXCR4 by flow cytometry in the bone marrow LK and LSK cells from the indicated mice.  $n=6$  in each group. (b) Quantitative analyses of the percentage of apoptotic cells in bone marrow LK and LSK cells from the indicated mice.  $n=3$  in each group. (c) Relative proliferation rate of the bone marrow c-kit<sup>+</sup> HSPCs from the indicated mice during ex vivo expansion.  $n=6$  in mDia2<sup>fl/fl</sup> group,  $n=4$  in mDia2<sup>fl/fl</sup> Vav-Cre group. (d) Experimental design of the homing assay.  $2 \times 10^6$  BMMCs from plpC treated mDia2<sup>fl/fl</sup> or mDia2<sup>fl/fl</sup> Mx-Cre mice mixed with an equal number of CD45.1<sup>+</sup> BMMCs from the wild type counterparts were injected into lethally irradiated wild type recipient mice. After 24 or 48 hours, BMMCs were obtained from the recipients for chimerism studies by flow cytometry. (e) Representative flow cytometry plots as described in d at 24 and 48 hours. (f) Quantitative analyses of e.  $n=3$  in each group. All the error bars represent the SEM of the mean.

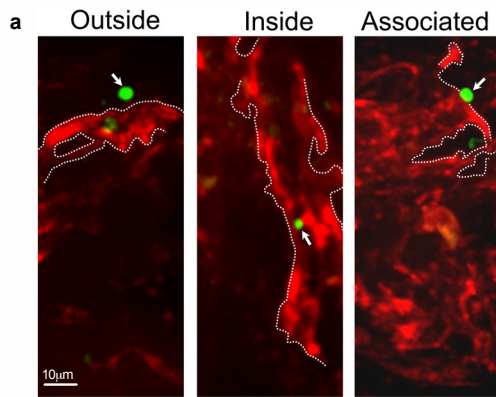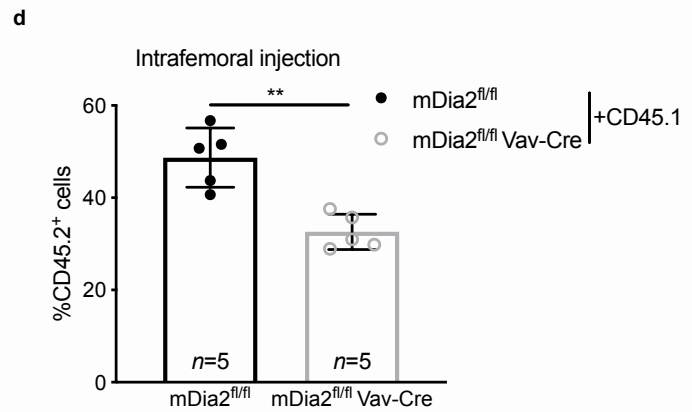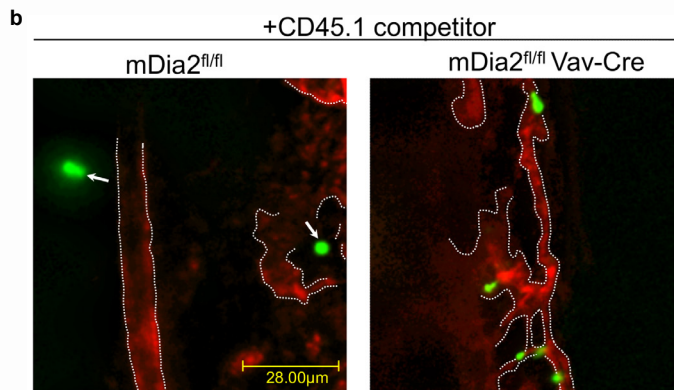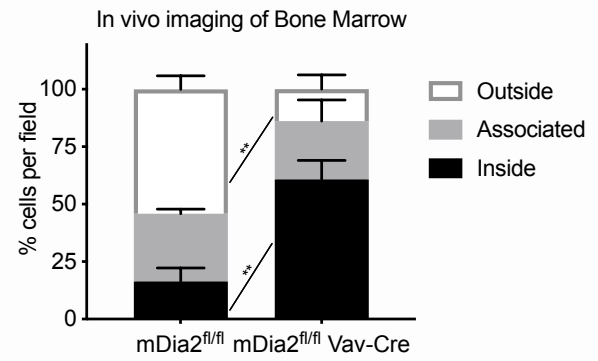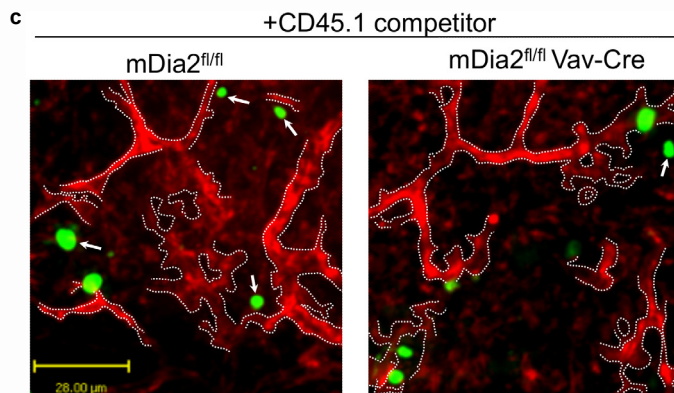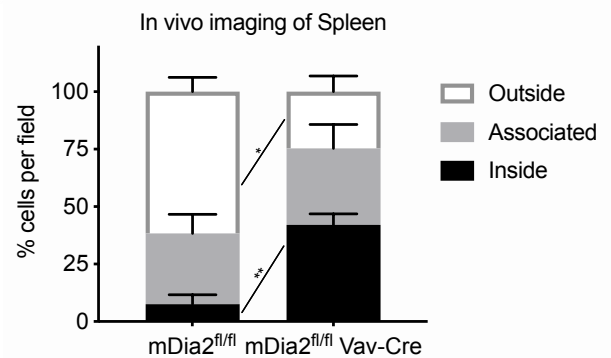



**Supplementary Figure 4. Loss of mDia2 compromises HSPC's trans-endothelial migration (a)**

Representative images of HSPC association with the vessels. Arrows point to the transplanted HSPCs. Dashed white lines outline the vessels. (b) *In vivo* imaging of fluorescently labeled lineage negative donor cells in the femur of the wild type mice 4 hours after non-irradiated competitive transplantation with equal number ( $9 \times 10^5$ ) of non-fluorescently labeled CD45.1+ cells. Red, CD31+ endothelial cells. Green, CD45.2+ donor cells. Dashed white lines outline the vessels. The relative position of the indicated donor cells to the outlined CD31+ lining sinusoids or arteries were quantified (right). N=39 cells from 6 random fields in mDia2<sup>fl/fl</sup> group. N=30 cells from 5 random fields in mDia2<sup>fl/fl</sup>Vav-Cre group. (c) Same as b except the spleen was analyzed. N=30 cells from 3 random fields in mDia2<sup>fl/fl</sup> group. N=24 cells from 3 random fields in mDia2<sup>fl/fl</sup>Vav-Cre group. (d)  $2 \times 10^6$  mDia2<sup>fl/fl</sup> or mDia2<sup>fl/fl</sup> Vav-Cre CD45.2+ BMDCs were mixed with equal number of wild-type CD45.1+ competitive BMDCs and transplanted into lethally irradiated wild type mice (CD45.1+, n=5 mice in each group) through intrafemoral route. Bone marrow chimerism studies were performed 4 weeks after transplantation using flow cytometric analyses. Error bars represent the SEM of the mean. \* $p < 0.05$ , \*\* $p < 0.01$ . Two-tailed unpaired student's t test was used to generate the p values.

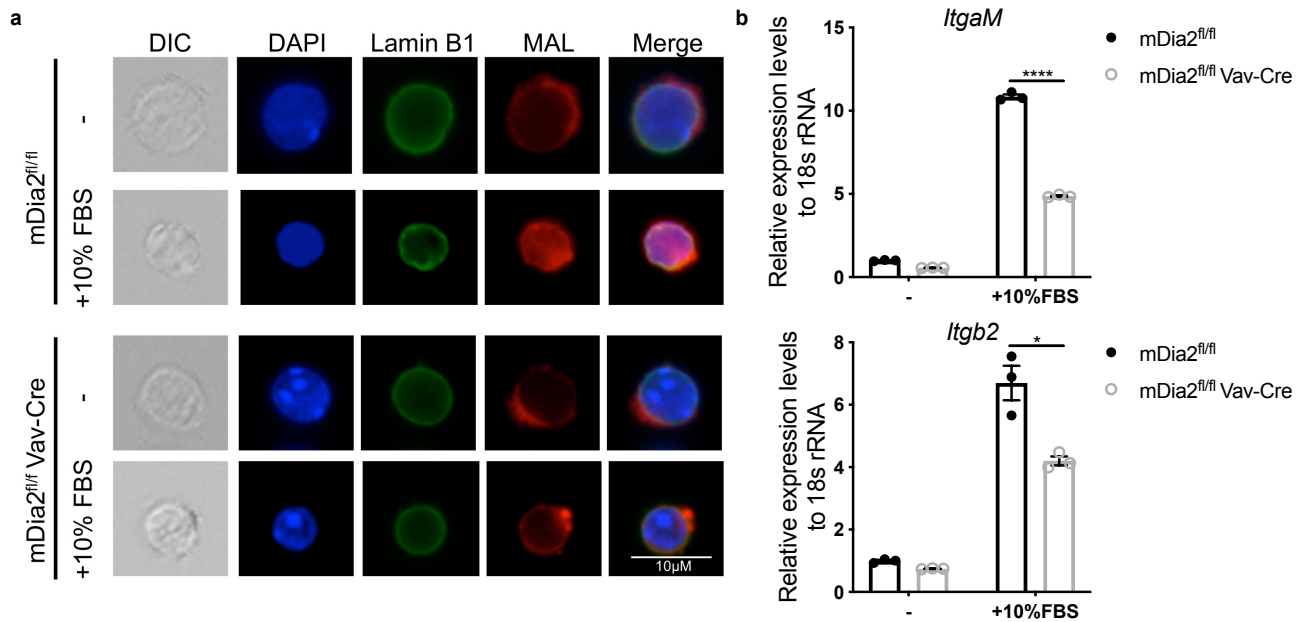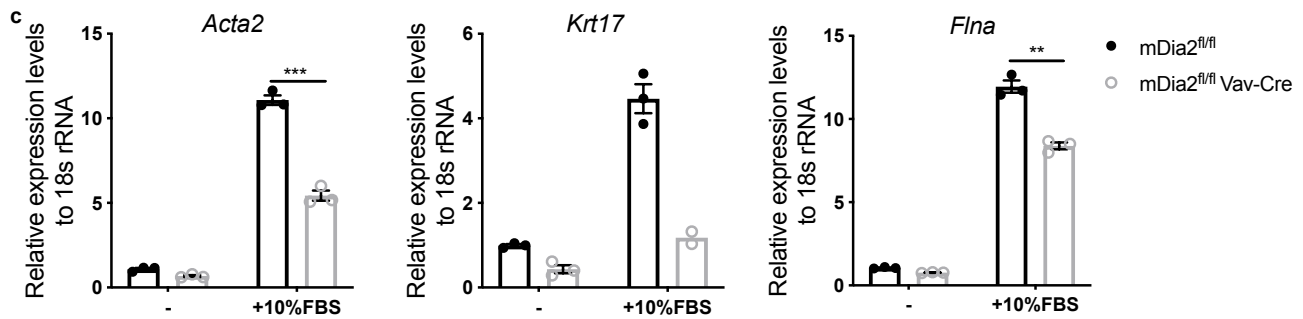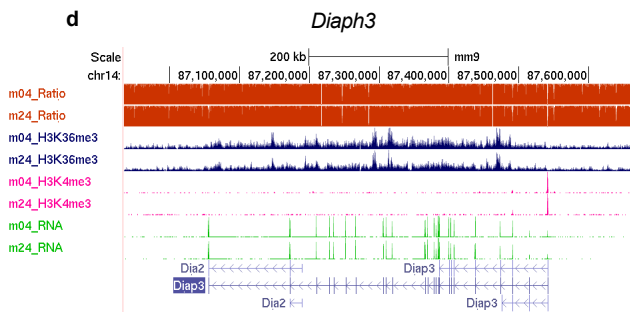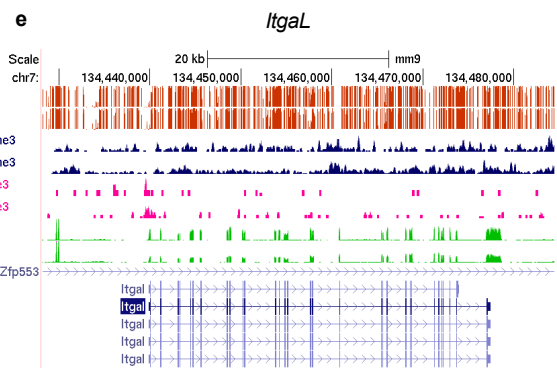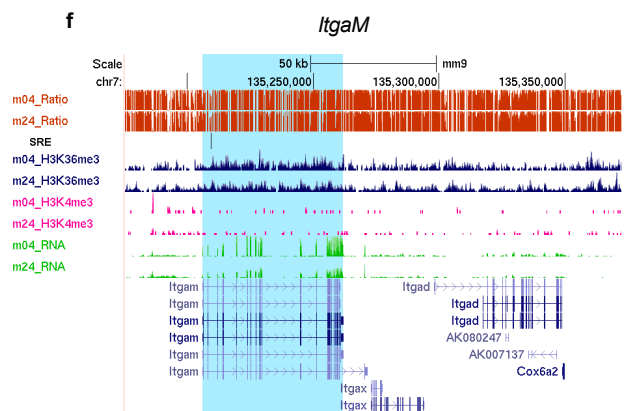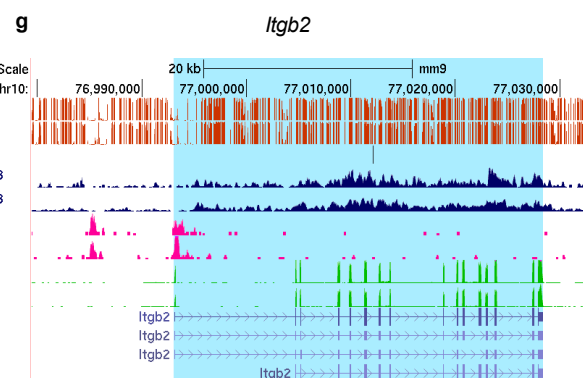

**Supplementary Figure 5. mDia2-SRF signaling is involved in the regulation of HSPC engraftment** (a) Immunofluorescence analyses of MAL and lamin B1 in c-Kit<sup>+</sup> HSPCs from the indicated mice incubated with or without FBS for 15 minutes. Repeated three times with similar results. (b) Relative mRNA expression levels of *ItgaM* and *Itgb2* in c-Kit<sup>+</sup> HSPCs from the indicated mice incubated with or without FBS for 15 minutes. (c) Same as b except the indicated genes were analyzed. The experiments in b and c were performed in triplicate. (d-g) UCSC browser track showing the expression (green, RNA-Seq), DNA methylation (red), H3K36me3 peaks (dark blue), and H3K4me3 for transcription start sites (TSS, pink) of actively transcribed regions of the indicated genes in young (4 months) and old (24 months) HSCs. Data were obtained from aging HSC Epigenome <sup>2</sup>. Blue shaded regions represent the genomic regions of *ItgaM* and *Itgb2*. Error bars represent the SEM of the mean. \* $p < 0.05$ , \*\* $p < 0.01$ , \*\*\* $p < 0.001$ , \*\*\*\* $p < 0.0001$ . Two-tailed unpaired student's t test was used to generate the p values.

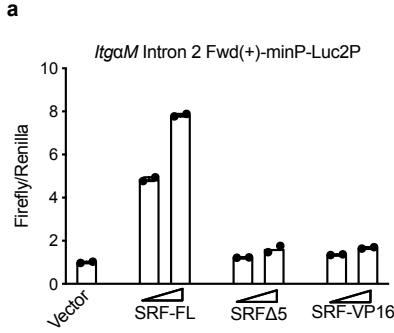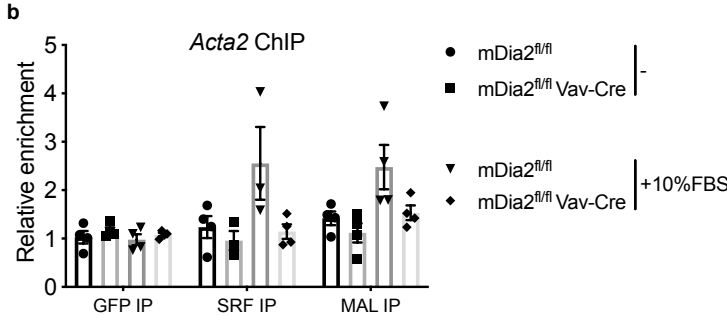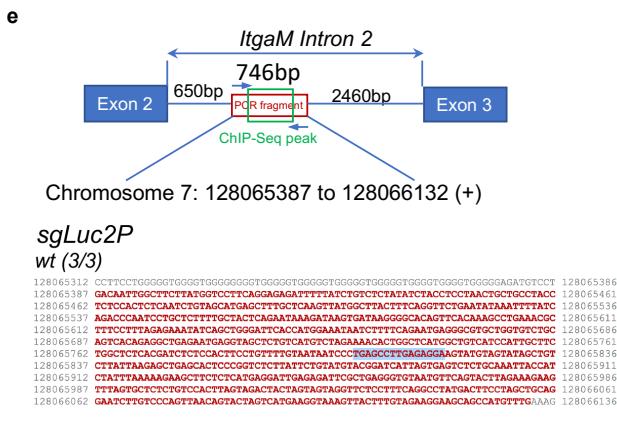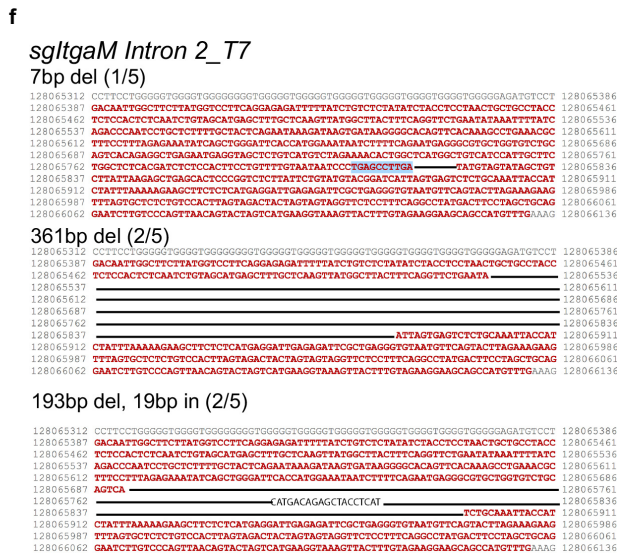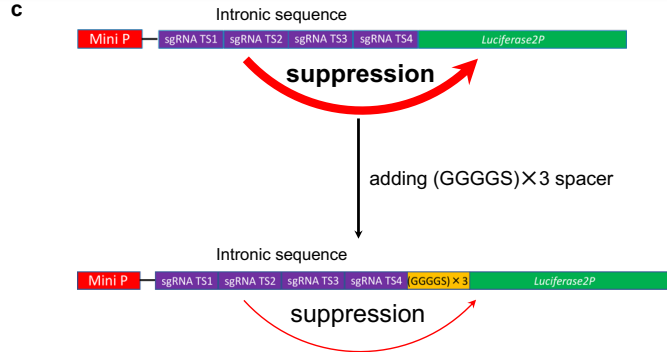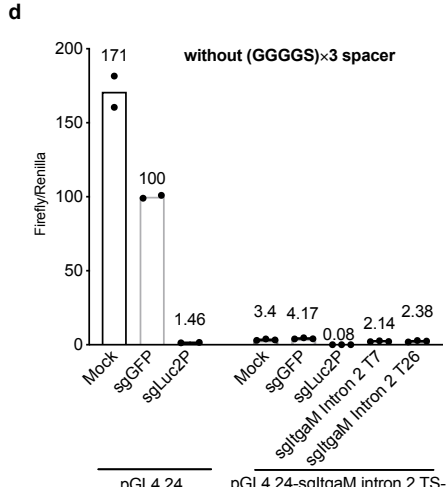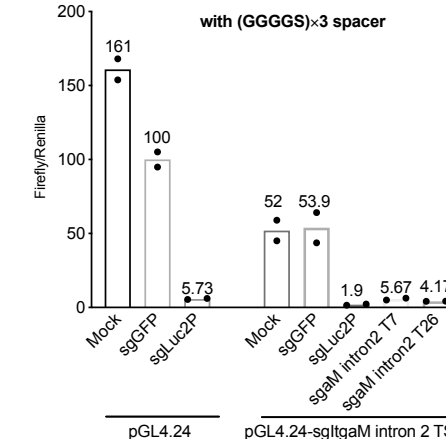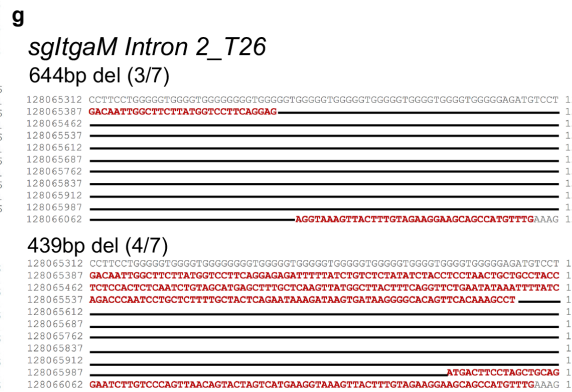

### Supplementary Figure 6. Targeting SRF intronic binding sites in *ItgaM* locus via CRISPR-Cas9

(a) Luciferase activity assay with reporter construct containing *ItgaM* intronic regions co-transfected with increased amount of SRF full length (SRF-FL), exon 5 deficient isoform (SRF $\Delta$ 5), or constitutively active SRF-VP16. Experiment was performed in duplicate. (b) Same ChIP assay was performed as in Fig. 4h except *Acta2* was analyzed by real-time PCR in quadruplicate. Error bars represent the SEM of the mean. (c) Schematic diagram showing the effect of (GGGGS) $\times$ 3 spacer in luciferase reporter assay-based screening of sgRNA targeting of the intronic regions. The details were described in Fig. 6a and methods. (d) Quantitative analyses of the activities of recombinant luciferase harboring intronic DNA-encoded epitope without (upper) or with (lower) the (GGGGS) $\times$ 3 spacer. sgLuc2P targeting luciferase gene was served as positive control. (GGGGS) $\times$ 3 spacer largely reduced the inhibition of luciferase activity by intronic DNA encoded epitope. Experiments were performed in duplicate except the upper panel in triplicate. Repeated twice with similar results. (e-g) Determination of in vivo genome editing within *ItgaM* intron 2 region containing SRF binding element (CArG-like motif). The genomic DNA was isolated from the peripheral blood of the recipient mice and the target regions shown in the upper panel of e were PCR-amplified. The PCR products were cloned and subjected to sequencing to confirm the indels and estimate the editing frequencies. sgLuc2P, negative control, 100% (3/3) clones contain intact wide type sequence (lower panel in e); sgITGAM Intron 2\_T7, 20% (1/5) clones contain a 7-bp nucleotide deletion occurred in the terminal region of CArG-like motif; 40% (2/5) clones contain a 361-bp deletion. 40% (2/5) clones contain a 193-bp deletion combined with a 19-bp insertion. They all lack the CArG-like motif (f); sgITGAM Intron 2\_T26, 42.9% (3/7) clones contain a 644-bp deletion. 57.1% (4/7) clones contain a 439-bp deletion. Both lack the CArG-like motif (g).

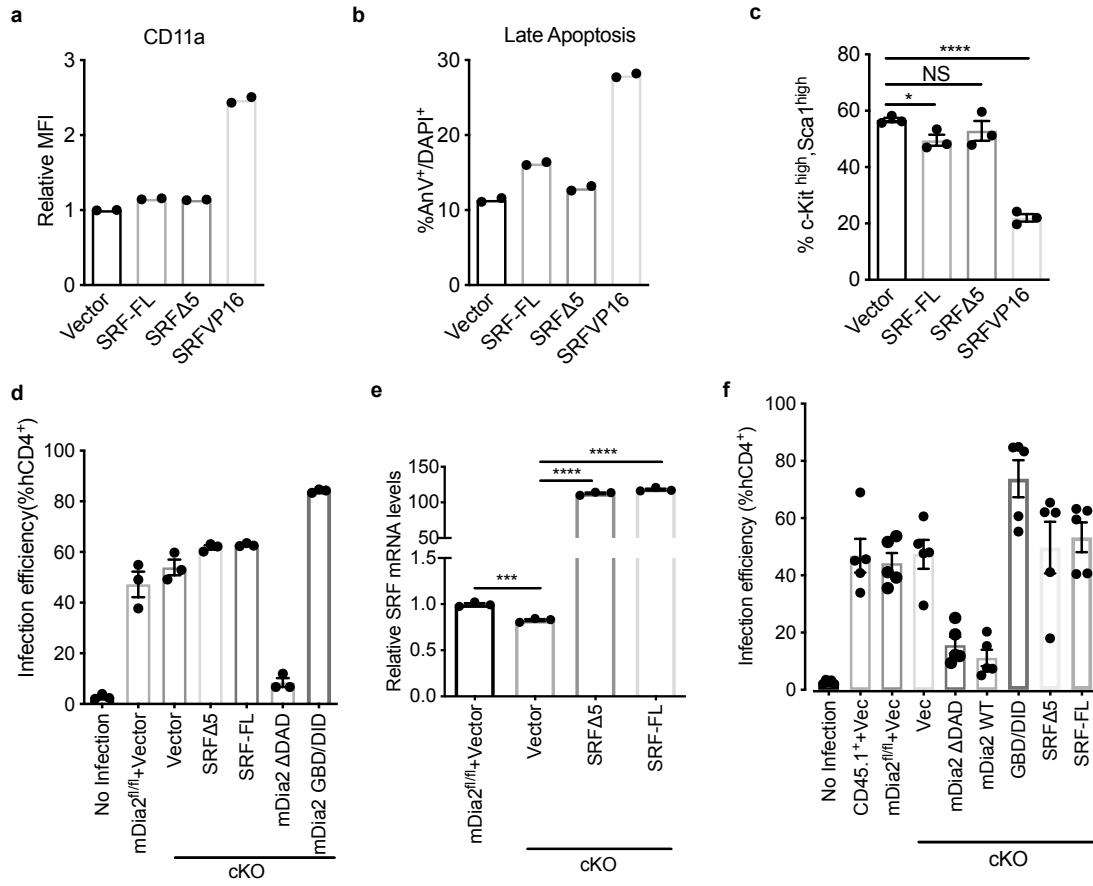

**Supplementary Figure 7. Expression of SRF and mDia2 variants** (a) Ex vivo cultured c-Kit<sup>+</sup> HSPCs transduced with indicated genes were examined for CD11a expression by flow cytometry. (b) Same as a except apoptosis was examined.  $n=2$  mice in each group for a, b. (c) Stemness (c-kit<sup>high</sup>/Sca1<sup>high</sup>) was examined in ex vivo cultured c-Kit<sup>+</sup> HSPCs.  $n=3$  mice in each group. (d) Transduction efficiency of the indicated genes detected by flow cytometry of human CD4 co-expressed from the vector.  $n=3$  mice in each group. (e) Quantitative analyses of the mRNA levels of SRF from indicated cells determined by quantitative RT-PCR. Experiment was performed in triplicate. (f) Transduction efficiency of the indicated constructs quantified by human CD4 expression through flow cytometry.  $n=5$  mice in each group. Error bars represent the SEM of the mean. \* $p < 0.05$ , \*\* $p < 0.01$ , \*\*\* $p < 0.001$ , \*\*\*\* $p < 0.0001$ . Two-tailed unpaired student's t test was used to generate the p values.

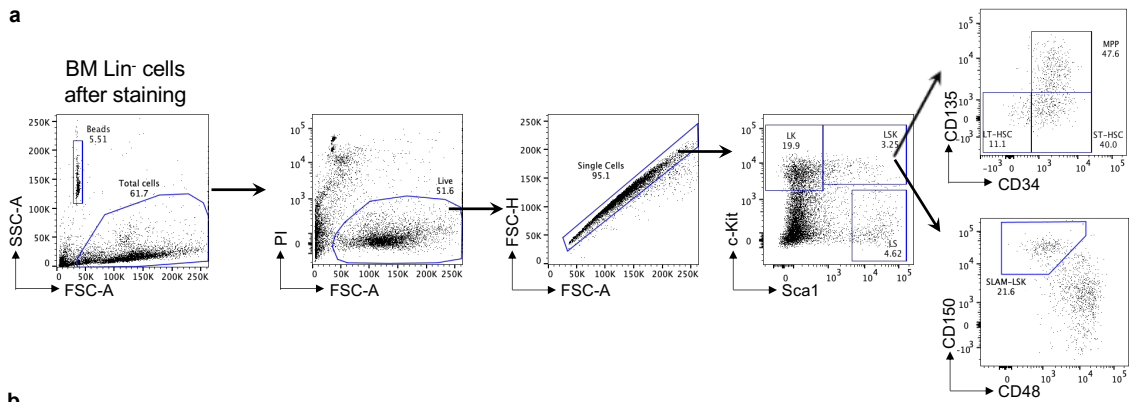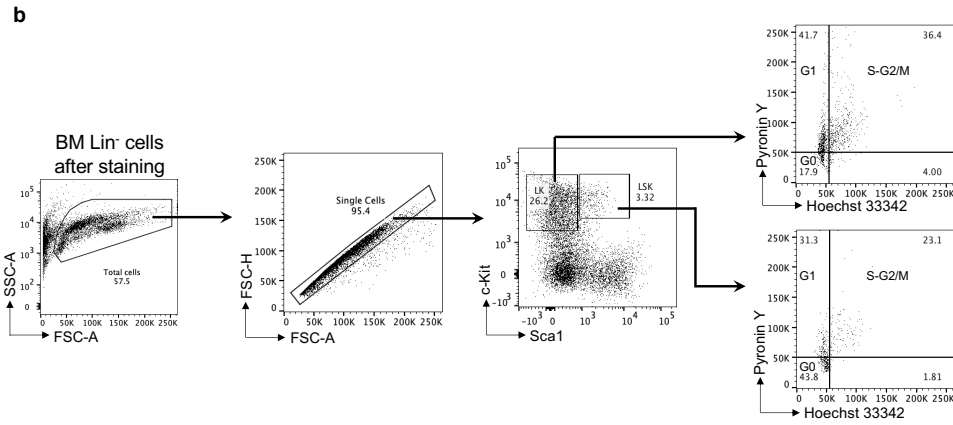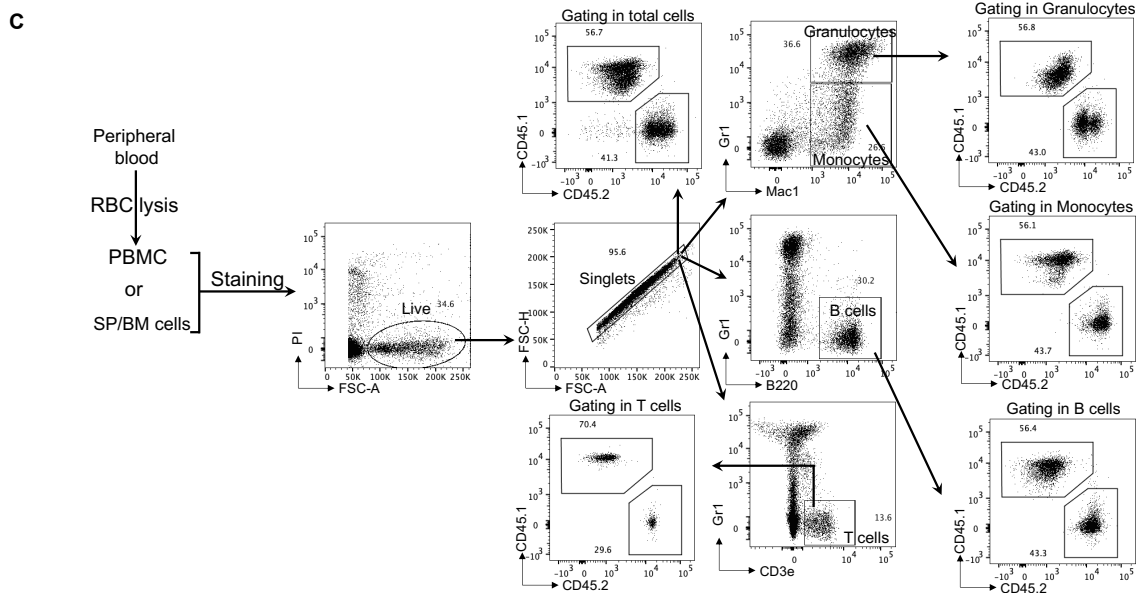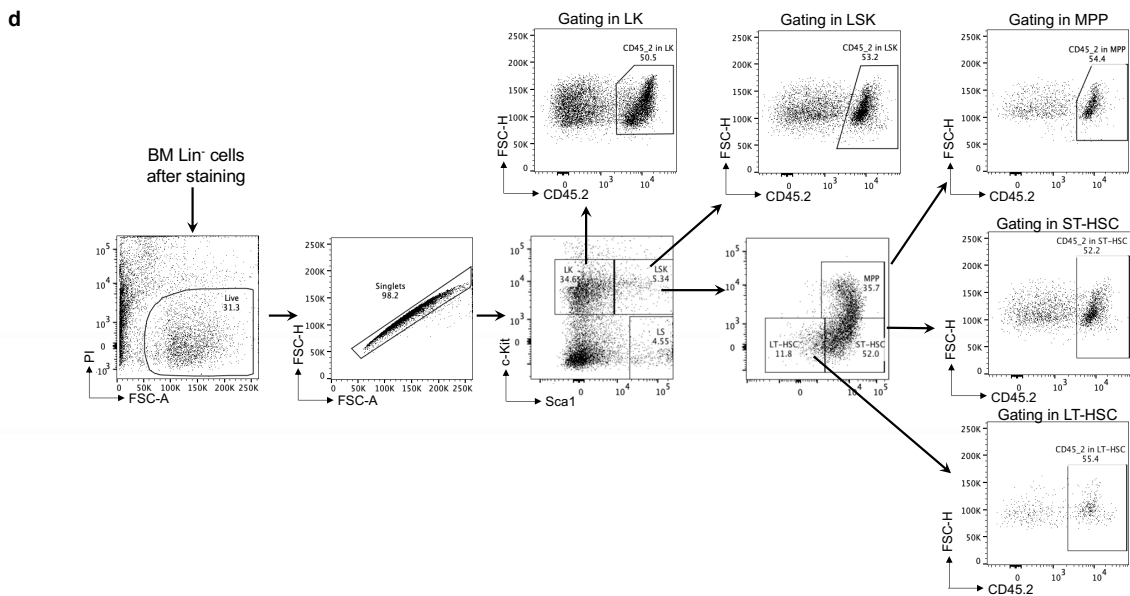



**Supplementary Figure 8. Flow cytometric gating strategies** (a) Flow cytometric gating of LT-HSC,ST-HSC,MPP and SLAM-LSK for Fig. 1a, 5g and Supplementary Figure 1c-d, 2a, 2c-d. (b) Gating strategy for stem cell quiescence for Fig. 1d, 1e and Supplementary Figure 2b. (c-d) Gating routines for peripheral blood, bone marrow, spleen and HSPCs in competitive bone marrow transplantation as shown in Fig. 2b-c, 5e-g, 6h-i and Supplementary Figure 2h-i.

## Supplementary Tables

**Supplementary Table 1. Primer sequences for cloning, RT-PCR, qPCR and ChIP assays**

| Name                          | Sequence (5' - 3')                                                               | Purposes/Comments                                                                                                                                                                                                                                  |
|-------------------------------|----------------------------------------------------------------------------------|----------------------------------------------------------------------------------------------------------------------------------------------------------------------------------------------------------------------------------------------------|
| ORF cloning into MICD4        |                                                                                  |                                                                                                                                                                                                                                                    |
| SRF-F                         | AAA GGATCC GCCGCC<br>ATGTTACCGAGCCAAGCTGGGGCCGC                                  | Forward and reverse primers for PCR amplification of mouse SRF ORF; BamHI and EcoRI restriction sites are highlighted in gray                                                                                                                      |
| SRF-R                         | GGG GAATTC<br>TCATTCACTCTTGGTGCTGTGGGTGGC                                        |                                                                                                                                                                                                                                                    |
| HA-SRF VP16-F                 | GGG GTTAAC GCCACC<br>ATGGCTTCTAGCTATCCTTATG                                      | Forward and reverse PCR primers containing HpaI and NotI restriction sites (gray).                                                                                                                                                                 |
| HA-SRF VP16-R                 | AAA GCGGCCGC<br>TTACTACCCACCGTAC                                                 |                                                                                                                                                                                                                                                    |
| Luciferase constructs cloning |                                                                                  |                                                                                                                                                                                                                                                    |
| CD18-Intron 6-F               | ACCTGAGCTCGCTAGCACATGGGTGC<br>AGCAAGTG                                           | Forward and reverse primers for 730bp <i>Itgβ2</i> intron 6 forward orientation cloning by In-Fusion. 15bp complementary overhangs are highlighted in gray.                                                                                        |
| CD18-Intron 6-R               | TCTAGTGTCTAAGCTTAAAGTGAAGC<br>CATCGTCTGTG                                        |                                                                                                                                                                                                                                                    |
| CD11b-Intron 2-F              | ACCTGAGCTCGCTAGCGACAATTGGC<br>TTCTTATGGTCC                                       | Forward and reverse primers for 746bp <i>ItgaM</i> intron 2 forward orientation cloning by In-Fusion. 15bp complementary overhangs are highlighted in gray. sglTgaM Intron 2 target region PCR, TA-cloning and sequencing for indels verification. |
| CD11b-Intron 2-R              | TCTAGTGTCTAAGCTTCAAACATGGCT<br>GCTTCCTTC                                         |                                                                                                                                                                                                                                                    |
| CD18 Intron 6-RCF             | ACCTGAGCTCGCTAGTAAAGTGAAG<br>CCATCGTCTGTG                                        | Forward and reverse primers for 730bp <i>Itgβ2</i> intron 6 reverse orientation cloning by In-Fusion. 15bp complementary overhangs are highlighted in gray.                                                                                        |
| CD18 Intron 6RCR              | TCTAGTGTCTAAGCTCACATGGGTGCA<br>GCAAGTG                                           |                                                                                                                                                                                                                                                    |
| CD11b Intron 2RCF             | ACCTGAGCTCGCTAGTCAAACATGGCT<br>GCTTCCTTC                                         | Forward and reverse primer for 746bp <i>ItgaM</i> intron 2 reverse orientation cloning by In-Fusion. 15bp complementary overhangs are highlighted in gray.                                                                                         |
| CD11b Intron 2RCR             | TCTAGTGTCTAAGCTCGACAATTGGCT<br>TCTTATGGTCC                                       |                                                                                                                                                                                                                                                    |
| Mutagenesis and deletion      |                                                                                  |                                                                                                                                                                                                                                                    |
| CD11b-AA mutant-F             | TCCACTTCCTGTTTTGTAATAATCCCTG<br>AGAAATTGAGAAAAGTATGTAGTATAG<br>CTGTCTTATTAAGAG   | Forward and reverse primers for site-direct mutagenesis of <i>ItgaM</i> intron 2 SRE site. AA mutant in this study.                                                                                                                                |
| CD11b-AA mutant-R             | CTCTTAATAAGACAGCTATACTACATAC<br>TTTTTCTCAATTCTCAGGGATTATTACA<br>AAACAGGAAGTGGGA  | Mutated nucleotides are highlighted in gray.                                                                                                                                                                                                       |
| CD11b-TC mutant-F             | CTGAGCCTTGAGAGGAAGTACGTAGT<br>ATAGCTGTCTTATTA                                    | Forward and reverse primers for site-direct mutagenesis of <i>ItgaM</i> intron 2 SRE site.                                                                                                                                                         |
| CD11b-TC mutant-R             | TAATAAGACAGCTATACTACGTACTTC<br>CTCTCAAGGCTCAG                                    | TC mutant in this study. Mutated nucleotides are highlighted in gray.                                                                                                                                                                              |
| CD11b-AATC mutant-F           | CCCTGAGAATTGAGAAAAGTACGTAG<br>TATAGCTGTCTTATTAAGAGCTGAGCA<br>CTC                 | Forward and reverse primers for site-direct mutagenesis of <i>ItgaM</i> intron 2 SRE site. AATC mutant in this study.                                                                                                                              |
| CD11b-AATC mutant-R           | GCTATACTACGTACTTTTTCTCAATTCT<br>CAGGGATTATTACAAAACAGGAAGTGG<br>AGAGATC           | Mutated nucleotides are highlighted in gray.                                                                                                                                                                                                       |
| CD18-MF                       | CTTCTTTTGTGGCTGGGAGGTGTTTGC<br>ATTTTAAAATACAAAAAATACTCTTTT<br>CCTTTCATGACTGTGTTG | Forward and reverse primers for site-direct mutagenesis of <i>Itgβ2</i> intron 6 SRE site in luciferase construct.                                                                                                                                 |
| CD18-MR                       | CAACACAGTCATGAAAGGAAAAGAGTA<br>TTTTTTGTATTTAAATGCAAACACC<br>TCCCAGCCACAAAAGAAG   | Mutated nucleotides are highlighted in gray.                                                                                                                                                                                                       |

|                  |                                                                     |                                                                                                   |
|------------------|---------------------------------------------------------------------|---------------------------------------------------------------------------------------------------|
| CD18-Deletion-F  | TGGCTGGGAGGTGTTTAATCTAGTTTC<br>AGGTCTGAAGAGGGTTGCAAAGACATT<br>TCTC  | Forward and reverse primers for 52bp deletion of <i>ItgaM</i> intron 2 region harboring SRE site. |
| CD18- Deletion-R | GACCTGAAACTAGATTA AACACCTCCC<br>AGCCACAAAAGAAGGGACCAAGGGAC<br>ATCCA |                                                                                                   |
| Quantitative PCR |                                                                     |                                                                                                   |
| <i>Acta2</i>     | F: GGCACCACTGAACCCTAAGG<br>R: ACAATACCAGTTGTACGTCCAGA               | qRT-PCR of <i>Acta2</i> , in Exon 4 and 5/6 <sup>3</sup> .                                        |
| <i>Krt17</i>     | F: AGCCGCATCCTGTCAGAGAT<br>R: CGGCCATCACGCCACAGTTT                  | qRT-PCR of <i>KRT-17</i> , both in Exon 4 <sup>4</sup> .                                          |
| <i>Flna</i>      | F: GAGTTCGGCATTGGACTAGG<br>R: GGGCTATCAGGTATGTGCTCC                 | qRT-PCR of <i>Flna</i> , in Exon 41 and 42 <sup>3</sup> .                                         |
| <i>Fhl2</i>      | F: GATCGGCACTGGCATGAAG<br>R: AGCAAAGGGCTTGTCCACC                    | qRT-PCR of <i>FHL2</i> , both in Exon 3 <sup>4</sup> .                                            |
| <i>Myh9</i>      | F: GGCCCTGCTAGATGAGGAGT<br>R: CTTGGGCTTCTGGAACCTGG                  | qRT-PCR of <i>Myh9</i> , both in Exon 14 <sup>3</sup> .                                           |
| <i>Actb</i>      | F: GGCTGTATTCCCCTCCATCG<br>R: CCAGTTGGTAACAATGCCATGT                | qRT-PCR of <i>Actb</i> , in Exon 2 and 3 <sup>3</sup> .                                           |
| <i>Actg1</i>     | F: CGTCCACCGCAAATGCTTC<br>R: TGCCAGGGCAAATTGATACT                   | qRT-PCR of <i>Actg1</i> , both in Exon 6 <sup>5</sup> .                                           |
| <i>Srf</i>       | F: GCAAGGCGCTGATTCAGAC<br>R: TCAGATTCCGACACCTGGTAG                  | qRT-PCR of <i>Srf</i> , both in Exon 2 <sup>3</sup> .                                             |
| <i>Egr3</i>      | F: AGCCCAATCCGGA ACTCTCTT<br>R: GGAAGGAGAGTCGAAAGCGAA               | qRT-PCR of <i>Egr3</i> , both in Exon 2 <sup>6</sup> .                                            |
| <i>Egr1</i>      | F: ATTGATGTCTCCGCTGCAGATC<br>R: TCAGCAGCATCATCTCCTCCA               | qRT-PCR of <i>Egr1</i> , both in Exon 1 <sup>6</sup> .                                            |
| <i>Fosb</i>      | F: GAGGGAGCTGACAGATCGAC<br>R: AACTCCAGGCGTTCCTTCT                   | qRT-PCR of <i>Fosb</i> , designed by Primer3 (version 0.4.0), in Exon 3 and 4.                    |
| <i>c-Fos</i>     | F: TGA CTGGAGGTCTGCCTGAGGCTT<br>R: GCTCCAAGGATGGCTTGGGCTC           | qRT-PCR of <i>Egr1</i> , both in Exon 4 <sup>7</sup> .                                            |
| <i>Coro1c</i>    | F: CGCAGAGCGTGCTTATTCG<br>R: TGCCAACCATTTCCAAA ACTAA                | qRT-PCR of <i>Coro1c</i> intron-containing pre-mRNA, both in Intron 1 <sup>7</sup> .              |
| <i>Jun B</i>     | F: ACAAGGTGAAGACACTCAAGGCT<br>R: ATGACCTTCTGCTTGAGCTGC              | qRT-PCR of <i>JunB</i> , both in Exon 1 <sup>6</sup> .                                            |
| <i>Egr2</i>      | F: GAGCAAATGATGACCGCAA<br>R: TGTCAGGCAGCTGGTGCATAA                  | qRT-PCR of <i>Egr2</i> , both in Exon 1 <sup>6</sup> .                                            |
| <i>Vcl</i>       | F: AGCCCAGATGCTTCAGTCAGA<br>R: GGTCAGATGTGCCAGAAAGGA                | qRT-PCR of <i>Vcl</i> , both in Exon 3 <sup>3</sup>                                               |
| <i>Nr4a1</i>     | F: GCTTGGCACCCACCTCTCCGA<br>R: CACGGGTGCGTCCAGAATGCC                | qRT-PCR of <i>Nr4a1</i> , both in Exon 2 <sup>7</sup> .                                           |
| <i>Tuftelin</i>  | F: AGGAAGTGGCTGGGTTTTCG<br>R: GAACTTTCCGCTGCTGGCT                   | qRT-PCR of <i>Tuftelin</i> , both in Exon 10 <sup>4</sup> .                                       |
| <i>Tagln</i>     | F: ACCAAAAACGATGGAACTACCG<br>R: GTGAAGTCCCTCTTATGCTCCT              | qRT-PCR of <i>Tagln</i> , both in Exon 4-5 <sup>3</sup> .                                         |
| <i>Itga1</i>     | F: CAGTGGAGGACATGTTTGGAT<br>R: TCTCTCTCTCCAACTGGACA                 | qRT-PCR of <i>Itga1</i> , designed by Primer3 (version 0.4.0), in Exon 2 and 3.                   |
| <i>Itga2</i>     | F: GCAACTGGCTACTGGTTGGT<br>R: AGCTTTTCACAGGTGGCAGT                  | qRT-PCR of <i>Itga2</i> , designed by Primer3 (version 0.4.0), in Exon 2/3 and 3.                 |
| <i>Itga4</i>     | F: GGGCTTGTGAACCCAACTTC<br>R: TGCATGTTTCTGGCTCGTTTT                 | qRT-PCR of <i>Itga4</i> , both in Exon 22 <sup>5</sup> .                                          |
| <i>Itga5</i>     | F: TTCTCCGTGGAGTTTTACCG<br>R: TAGACAGCACCACTTGCGAG                  | qRT-PCR of <i>Itga5</i> , designed by Primer3 (version 0.4.0), in Exon 1 and 2.                   |
| <i>ItgaL</i>     | F: CCCGCTTGGTCGGTTTTG<br>R: CAGTCAGCCTATCCCCATTGA                   | qRT-PCR of <i>ItgaL</i> , both in Exon 14 <sup>5</sup> .                                          |
| <i>ItgaM</i>     | F: CTGAACATCCCATGACCTTCC<br>R: GCCCAAGGACATATTCACAGC                | qRT-PCR of <i>ItgaM</i> , in Exon 2 and 4 <sup>8</sup> .                                          |

|                              |                                                                                                                                                                                                                                                                                                                                                                                                                                                  |                                                                                                                                                                                        |
|------------------------------|--------------------------------------------------------------------------------------------------------------------------------------------------------------------------------------------------------------------------------------------------------------------------------------------------------------------------------------------------------------------------------------------------------------------------------------------------|----------------------------------------------------------------------------------------------------------------------------------------------------------------------------------------|
| <i>Itgb1</i>                 | F: GGTTTCCTGGATTGGATTGA<br>R: CAATTTGGCCCTGCTTGTAT                                                                                                                                                                                                                                                                                                                                                                                               | qRT-PCR of <i>Itgb1</i> , designed by Primer3 (version 0.4.0), in Exon 2 and 3.                                                                                                        |
| <i>Itgb2</i>                 | F: TTTCGGCACGTGCTCAAG<br>R: TTGCCGACCTCTGTCTGAAAC                                                                                                                                                                                                                                                                                                                                                                                                | qRT-PCR of <i>Itgb2</i> , both in Exon 6 <sup>5</sup> .                                                                                                                                |
| RT-PCR                       |                                                                                                                                                                                                                                                                                                                                                                                                                                                  |                                                                                                                                                                                        |
| SRF RT-PCR-F                 | CCTCAACTCGCCAGACTCTC                                                                                                                                                                                                                                                                                                                                                                                                                             | Forward and reverse primers for RT-PCR detecting murine SRF truncations.                                                                                                               |
| SRF RT-PCR-R                 | CAGGAACACCTGAGGGACAC                                                                                                                                                                                                                                                                                                                                                                                                                             |                                                                                                                                                                                        |
| gBlock DNA                   |                                                                                                                                                                                                                                                                                                                                                                                                                                                  |                                                                                                                                                                                        |
| <i>Itgb2/aM</i> CDS          | ggtaaagccaccatgaAGTACAAAGTCAGCA<br>GTTGCCGGGACTGTATCCAGTCGGGG<br>CCTGGCTGTTCTGGTGCCAGAAGCT<br>GTCACTGCTGCTTGCCCTAGCTGGACT<br>GTTCTTCCTGGGATCTGcACGGGCACA<br>GCTGCTGCTGAAGGTTGTCCAGCCG<br>ATGATATCATGGACCCAGGAGCATC<br>GCTAATCCTGAGTTCGACCAACGGGG<br>GCAACGGAAACAGCCCCATGACCTTC<br>CAAGAGAATGCAAAGGCTTTGGACA<br>GAGTGTGGTCCAGCTTGGCGGACCAG<br>TGTGGTTGTTGCAGCCCCCAGGAGG<br>CAAAGGCTGTTAACCAGACAGGtgaagat<br>gccaaaaacattaagaagggcccagcgccattctacc | Oligo sequence containing potential sgRNA target sites for both <i>Itgb2</i> and <i>ItgaM</i> protein coding regions was shown in uppercase.                                           |
| <i>ItgaM</i> intron 2        | ggtaaagccaccatgATCCGTACATACAGAA<br>TAAGAGACCGGGGCTATACTACATACT<br>TCCTCTCAAGGCTCAGGGATTATTACA<br>ACAGCCTCTGTGACTGCAGACACCAG<br>CACGGTGGAGGTGGAAGTGGAGGTG<br>GAGGTTCTGGAGGCGGGGGTAGCgaa<br>gatgccaaaaacattaagaagggcccagcgccattct<br>acc                                                                                                                                                                                                           | Oligo sequence containing potential sgRNA target sites covering SRE in <i>ItgaM</i> intron 2 region was shown in uppercase, and underlined sequence encoded (GSSSS) $\times$ 3 spacer. |
| 15bp-F                       | ggtaaagccaccatg                                                                                                                                                                                                                                                                                                                                                                                                                                  | PCR primers for gBlock amplification to introduce 15bp overhang for In-Fusion reactions.                                                                                               |
| 15bp-R                       | ggtagaatggcgctg                                                                                                                                                                                                                                                                                                                                                                                                                                  |                                                                                                                                                                                        |
| sgRNA sequence               |                                                                                                                                                                                                                                                                                                                                                                                                                                                  |                                                                                                                                                                                        |
| sgLuc2P                      |                                                                                                                                                                                                                                                                                                                                                                                                                                                  |                                                                                                                                                                                        |
| sgItgb2_ T6                  | F: CACCg ATCCTGAGTTCGACCAACGG<br>R: AAAC CCGTTGGTCGAACCTCAGGAT<br>C                                                                                                                                                                                                                                                                                                                                                                              | sgRNA targeting <i>Itgb2</i> Exon4 with high efficiency, used in all subsequent experiments.                                                                                           |
| sgItgb2_ T13                 | F: CACCg<br>AGTCGGGGCCTGGCTGTTCC<br>R: AAAC GGAACAGCCAGCCCCGACT<br>C                                                                                                                                                                                                                                                                                                                                                                             | sgRNA targeting <i>Itgb2</i> Exon3 with minimal suppression effect.                                                                                                                    |
| sgItgaM_ T4                  | F: CACCg<br>CAGAGTGTGGTCCAGCTTGG<br>R: AAAC CCAAGCTGGACCACACTCTG<br>C                                                                                                                                                                                                                                                                                                                                                                            | sgRNA targeting <i>ItgaM</i> Exon2 with high efficiency, used in all subsequent experiments.                                                                                           |
| sgItgaM_ T12                 | F: CACCg TAACAGCCTTTGCCTCCTGG<br>R: AAAC CCAGGAGGCAAAGGCTGTTA<br>C                                                                                                                                                                                                                                                                                                                                                                               | sgRNA targeting <i>ItgaM</i> Exon3 with lower efficiency.                                                                                                                              |
| sgItgaM_ intron 2_ T7        | F: CACCgATACTACATACTTCCTCTCA<br>R: AAAGTGAAGGAAAGTATGTAGTATC                                                                                                                                                                                                                                                                                                                                                                                     | sgRNA targeting <i>ItgaM</i> intron 2 SRF binding site.                                                                                                                                |
| sgItgaM_ intron 2_ T26       | F: CACCgATACTTCCTCTCAAGGCTCA<br>R:<br>AAAGTGAAGGAAAGTATGTAGTATC                                                                                                                                                                                                                                                                                                                                                                                  | sgRNA targeting <i>ItgaM</i> intron 2 SRF binding site.                                                                                                                                |
| ChIP qRT-PCR primer sequence |                                                                                                                                                                                                                                                                                                                                                                                                                                                  |                                                                                                                                                                                        |
| ChIP- <i>ItgaM</i>           | F: GGCTGTCATCCATTGCTTCT<br>R: ACCCTCAGCGAATCTCTCAA                                                                                                                                                                                                                                                                                                                                                                                               | qRT-PCR primers for ChIP assay detecting SRF binding in <i>ItgaM</i>                                                                                                                   |

|            |                                                          |                                                                   |
|------------|----------------------------------------------------------|-------------------------------------------------------------------|
| ChIP-Itgb2 | F: CTGGGAGGTGTTTGCATTTT<br>R: CAATCCAGTGCCAAGGAAGT       | qRT-PCR primers for ChIP assay detecting SRF binding in Itgb2     |
| ChIP-LINE1 | F: AAACGAGGAGTTGGTTCTTTGAG<br>R: TTTGTCCCTGTGCCCTTTAGTGA | qRT-PCR primers of negative control for ChIP assay                |
| ChIP-Acta2 | F: GAGGCCTGGGTCTCTTCCA<br>R: GCTGAGCTGCCTCCTGTTTC        | qRT-PCR primers for ChIP assay detecting SRF/MAL binding in Acta2 |

## Supplementary Table 2. Antibodies used for FACS and immunofluorescence staining

| Antibodies for flow cytometric assay       |                           |                                                |
|--------------------------------------------|---------------------------|------------------------------------------------|
| Antibody                                   | Catalog number            | Supplier or comments                           |
| APC-CD11b(human)                           | ICRF44, Cat# 301310       | BioLegend, 1:100 dilution                      |
| APC-CD11b(mouse)                           | M1/70, Cat# 17-0112-82    | eBioscience, 1:100 dilution                    |
| APC-CD18                                   | C71/16, Cat# 562828       | BD Pharmingen, 1:100 dilution                  |
| APC-CD11a                                  | M17/4, Cat# 101119        | BioLegend, 1:100 dilution                      |
| BV421-CD18                                 | M18/2, Cat# 744597        | BD OptiBuild, 1:100 dilution                   |
| V500-CD11b                                 | M1/70, Cat# 562127        | BD Horizon, 1:100 dilution                     |
| Biotin-c-Kit                               | 2B8, Cat# 13-1171-85      | eBioscience, 1:100 dilution                    |
| PE-CD11b                                   | M1/70, Cat# 553311        | BD Pharmingen, 1:100 dilution                  |
| PE-Cy7-Gr1                                 | RB6-8C5, Cat# 108416      | BioLegend, 1:100 dilution                      |
| Pacific Blue-B220                          | RA3-6B2, Cat# 103227      | BioLegend, 1:100 dilution                      |
| APC-eFluor780-CD3e                         | 17A2, Cat# 47-0032-82     | eBioscience, 1:100 dilution                    |
| APC/Fire 750-CD3e                          | 17A2, Cat# 100248         | BioLegend, 1:100 dilution                      |
| FITC-CD45.2                                | 104, Cat# 109806          | BioLegend, 1:100 dilution                      |
| V500-CD45.2                                | 104, Cat# 562130          | BD Horizon, 1:100 dilution                     |
| APC-CD45.1                                 | A20, Cat# 110714          | BioLegend, 1:100 dilution                      |
| PE-Sca1(Ly-6A/E)                           | D7, Cat# 108108           | BioLegend, 1:100 dilution                      |
| PE-Cy7-CD117(c-Kit)                        | 2B8, Cat# 105814          | BioLegend, 1:100 dilution                      |
| APC-CD135                                  | A2F10, Cat# 135310        | BioLegend, 1:100 dilution                      |
| BV421-CD34                                 | RAM34, Cat# 562608        | BD Horizon, 1:100 dilution                     |
| PerCP-Cy5.5-CD16/CD32                      | 93, Cat# 101323           | BioLegend, 1:100 dilution                      |
| Pacific Blue-CD117 (c-Kit)                 | 2B8, Cat# 105820          | BioLegend, 1:100 dilution                      |
| APC-CD150 (SLAM)                           | TC15-12F12.2, Cat# 115910 | BioLegend, 1:100 dilution                      |
| APC-eFluor780-CD48                         | HM48-1, Cat# 47-0481-82   | eBioscience, 1:100 dilution                    |
| PerCP-Cy5.5-CD127(IL-7Ra)                  | A7R34, Cat# 135022        | BioLegend, 1:100 dilution                      |
| APC-CD184 (CXCR4)                          | 2B11, Cat# 17-9991-80     | eBioscience, 1:100 dilution                    |
| APC-CD117(c-Kit)                           | 2B8, Cat# 17-1171-82      | eBioscience, 1:100 dilution                    |
| Antibodies for immunofluorescence staining |                           |                                                |
| Alexa Fluor 594 Phalloidin                 | Cat# A12381               | Thermo Fisher Scientific, 165 nM               |
| Alexa Fluor 647 anti-Tubulin- $\alpha$     | Cat# 627908               | BioLegend, 1:300 dilution                      |
| Anti-MAL                                   | Cat# sc-390324            | Santa Cruz Biotechnology, 1:200 dilution       |
| anti-Lamin B1                              | Cat# ab16048              | Abcam, 1:200 dilution                          |
| Alex Fluor 594 goat anti-mouse IgG         | Cat# A-11005              | Thermo Fisher Scientific, 1:400 dilution       |
| Alex Fluor 647 donkey anti-rabbit IgG      | Cat# A-31573              | Thermo Fisher Scientific, 1:400 dilution       |
| Antibodies for other use                   |                           |                                                |
| PE-CD31                                    | Cat# 12-0311-82           | Thermo Fisher Scientific, 3 $\mu$ g/ml         |
| anti-SRF                                   | 2C5, Cat# 61386           | Active Motif, 3-5 $\mu$ g per ChIP             |
| anti-MAL                                   | Cat# sc-390324            | Santa Cruz Biotechnology, 3-5 $\mu$ g per ChIP |
| anti-GFP                                   | B2, Cat# sc-9996          | Santa Cruz Biotechnology, 3-5 $\mu$ g per ChIP |

## Supplementary References

1. Seita, J. *et al.* Gene Expression Commons: an open platform for absolute gene expression profiling. *PLoS One* **7**, e40321 (2012).
2. Sun, D. *et al.* Epigenomic profiling of young and aged HSCs reveals concerted changes during aging that reinforce self-renewal. *Cell Stem Cell* **14**, 673-688 (2014).
3. Vasudevan, H.N. & Soriano, P. SRF regulates craniofacial development through selective recruitment of MRTF cofactors by PDGF signaling. *Dev Cell* **31**, 332-344 (2014).
4. Philippar, U. *et al.* The SRF target gene Fhl2 antagonizes RhoA/MAL-dependent activation of SRF. *Mol Cell* **16**, 867-880 (2004).
5. Costello, P. *et al.* MRTF-SRF signaling is required for seeding of HSC/Ps in bone marrow during development. *Blood* **125**, 1244-1255 (2015).
6. Costello, P. *et al.* Ternary complex factors SAP-1 and Elk-1, but not net, are functionally equivalent in thymocyte development. *J Immunol* **185**, 1082-1092 (2010).
7. Mylona, A. *et al.* The essential function for serum response factor in T-cell development reflects its specific coupling to extracellular signal-regulated kinase signaling. *Mol Cell Biol* **31**, 267-276 (2011).
8. Mei, Y. *et al.* Loss of mDia1 causes neutropenia via attenuated CD11b endocytosis and increased neutrophil adhesion to the endothelium. *Blood Adv* **1**, 1650-1656 (2017).
